# Supplementary material
Source: PubMed Central journal article supplement (PMC2724332)

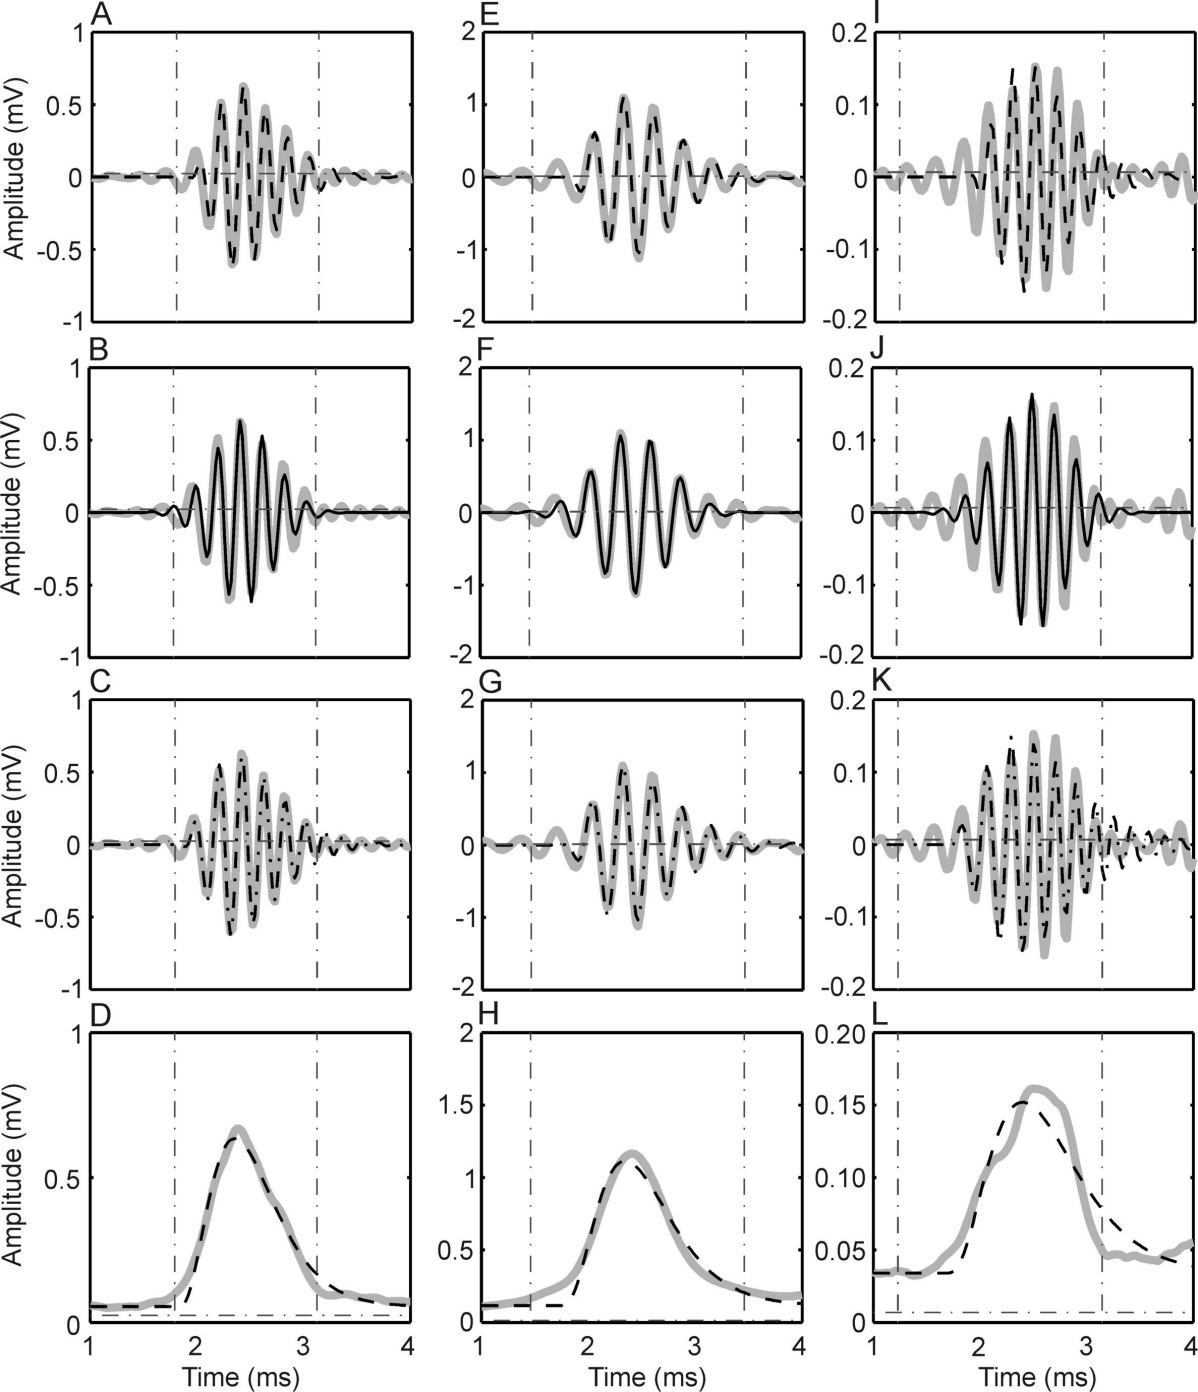

Supplement: supp_00092.2009_figS1.pdf [file supp_00092.2009_figS1.pdf]
